# Supplementary material for: Distinct population code for movement kinematics and changes of ongoing movements in human subthalamic nucleus
Source: eLife journal article supplement (doi:10.7554/elife.64893), 2021-09-14
Supplement: supp [file elife-64893-supp-v1.zip]

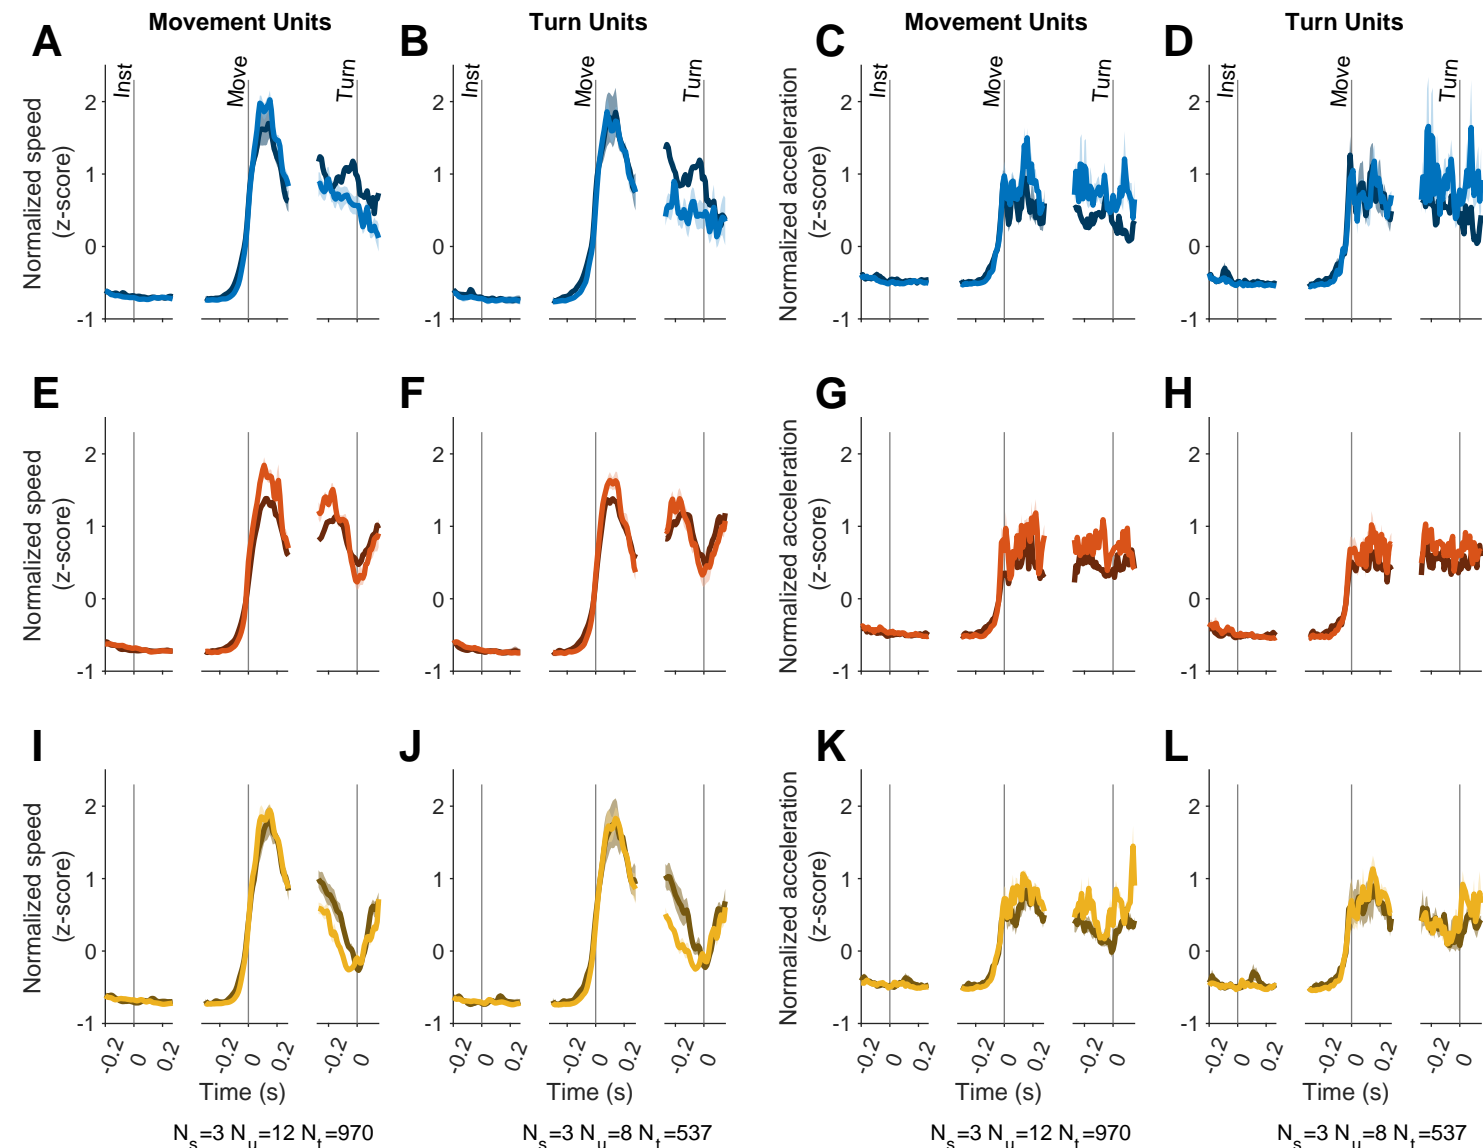

**Figure 5 - figure supplement 1: Kinematics of medial and lateral trials.** Speed and acceleration are similar on medial (lighter color) compared to lateral trials. Speeds are plotted in the left two columns and accelerations in the right two columns. Shading is SE.
