# Supplementary material for: Distinct population code for movement kinematics and changes of ongoing movements in human subthalamic nucleus
Source: eLife journal article supplement (doi:10.7554/elife.64893), 2021-09-14
Supplement: supp [file elife-64893-supp-v1.zip]

**A**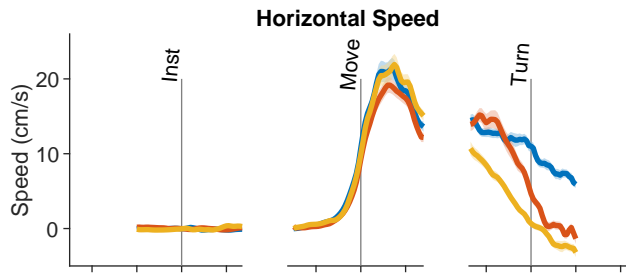**B**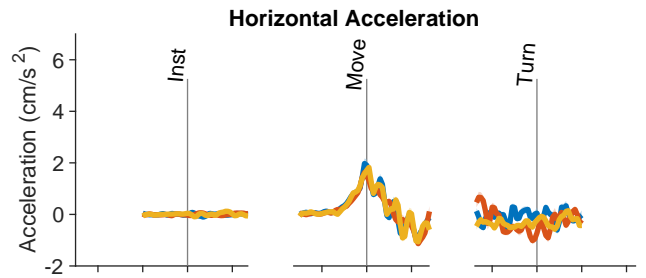**C**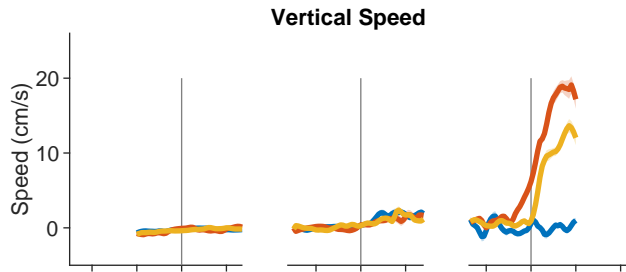**D**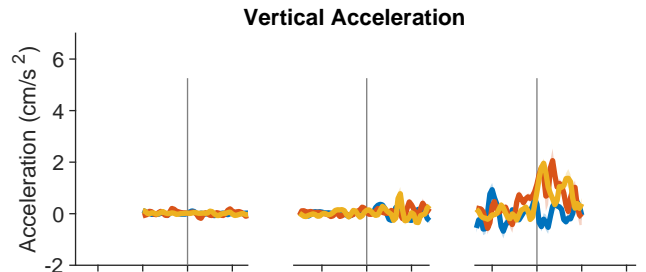**E**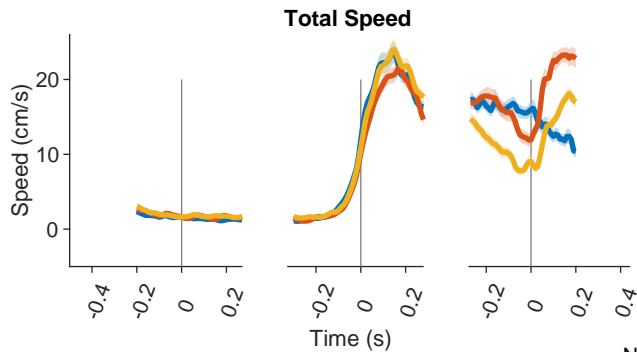**F**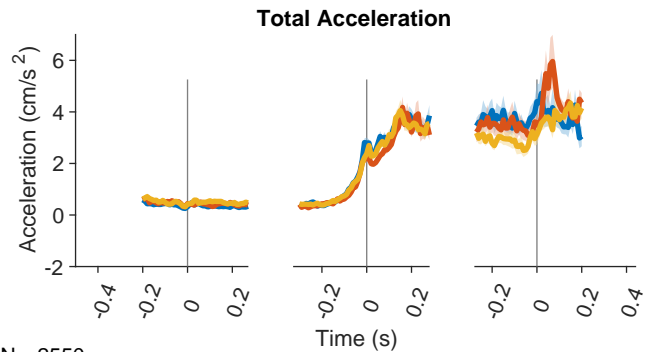
 $N_s=8$   $N_u=39$   $N_t=2550$ 

**Figure 4 – figure supplement 1: Movement speed and acceleration.** Mean speed and acceleration on different trial types across subjects. Total speed (E) is calculated as the Euclidean norm of the horizontal and vertical speed. Similarly, total acceleration (F) is calculated as the Euclidean norm of the horizontal and vertical acceleration. Shading indicates SE.
