# Supplementary material for: Distinct population code for movement kinematics and changes of ongoing movements in human subthalamic nucleus
Source: eLife journal article supplement (doi:10.7554/elife.64893), 2021-09-14
Supplement: supp [file elife-64893-supp-v1.zip]

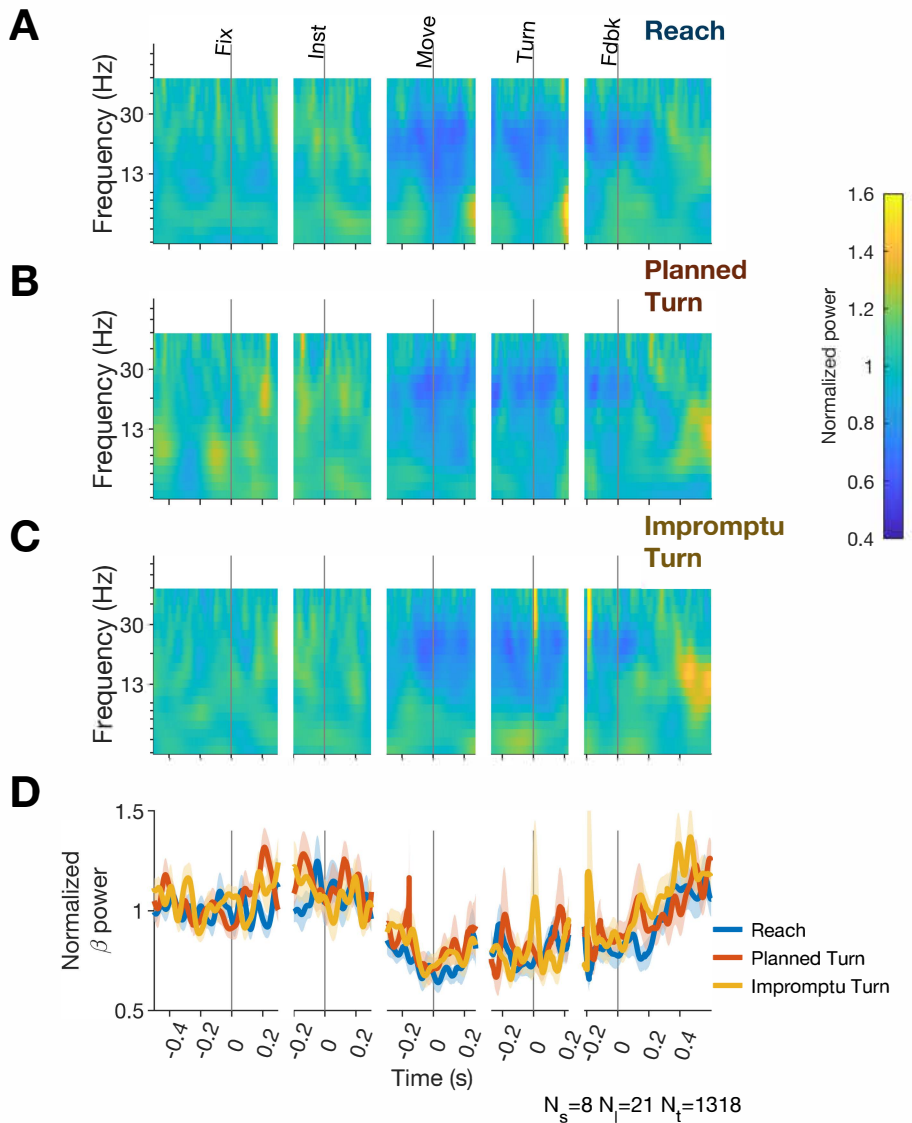

**Figure 7 – figure supplement 1: LFP responses.** Induced power spectrograms (A-C) and induced power in the beta range (D) aligned to task events are shown for different trial types. Induced power decreases from baseline beginning before movement onset and lasting until after feedback. There were no significant differences between trial types (no significant clusters identified by cluster mass test).  $N_s$ ,  $N_l$ , and  $N_t$  indicate the number of subjects, recording locations, and trials.
