# Supplementary material for: Distinct population code for movement kinematics and changes of ongoing movements in human subthalamic nucleus
Source: eLife journal article supplement (doi:10.7554/elife.64893), 2021-09-14
Supplement: supp [file elife-64893-supp-v1.zip]

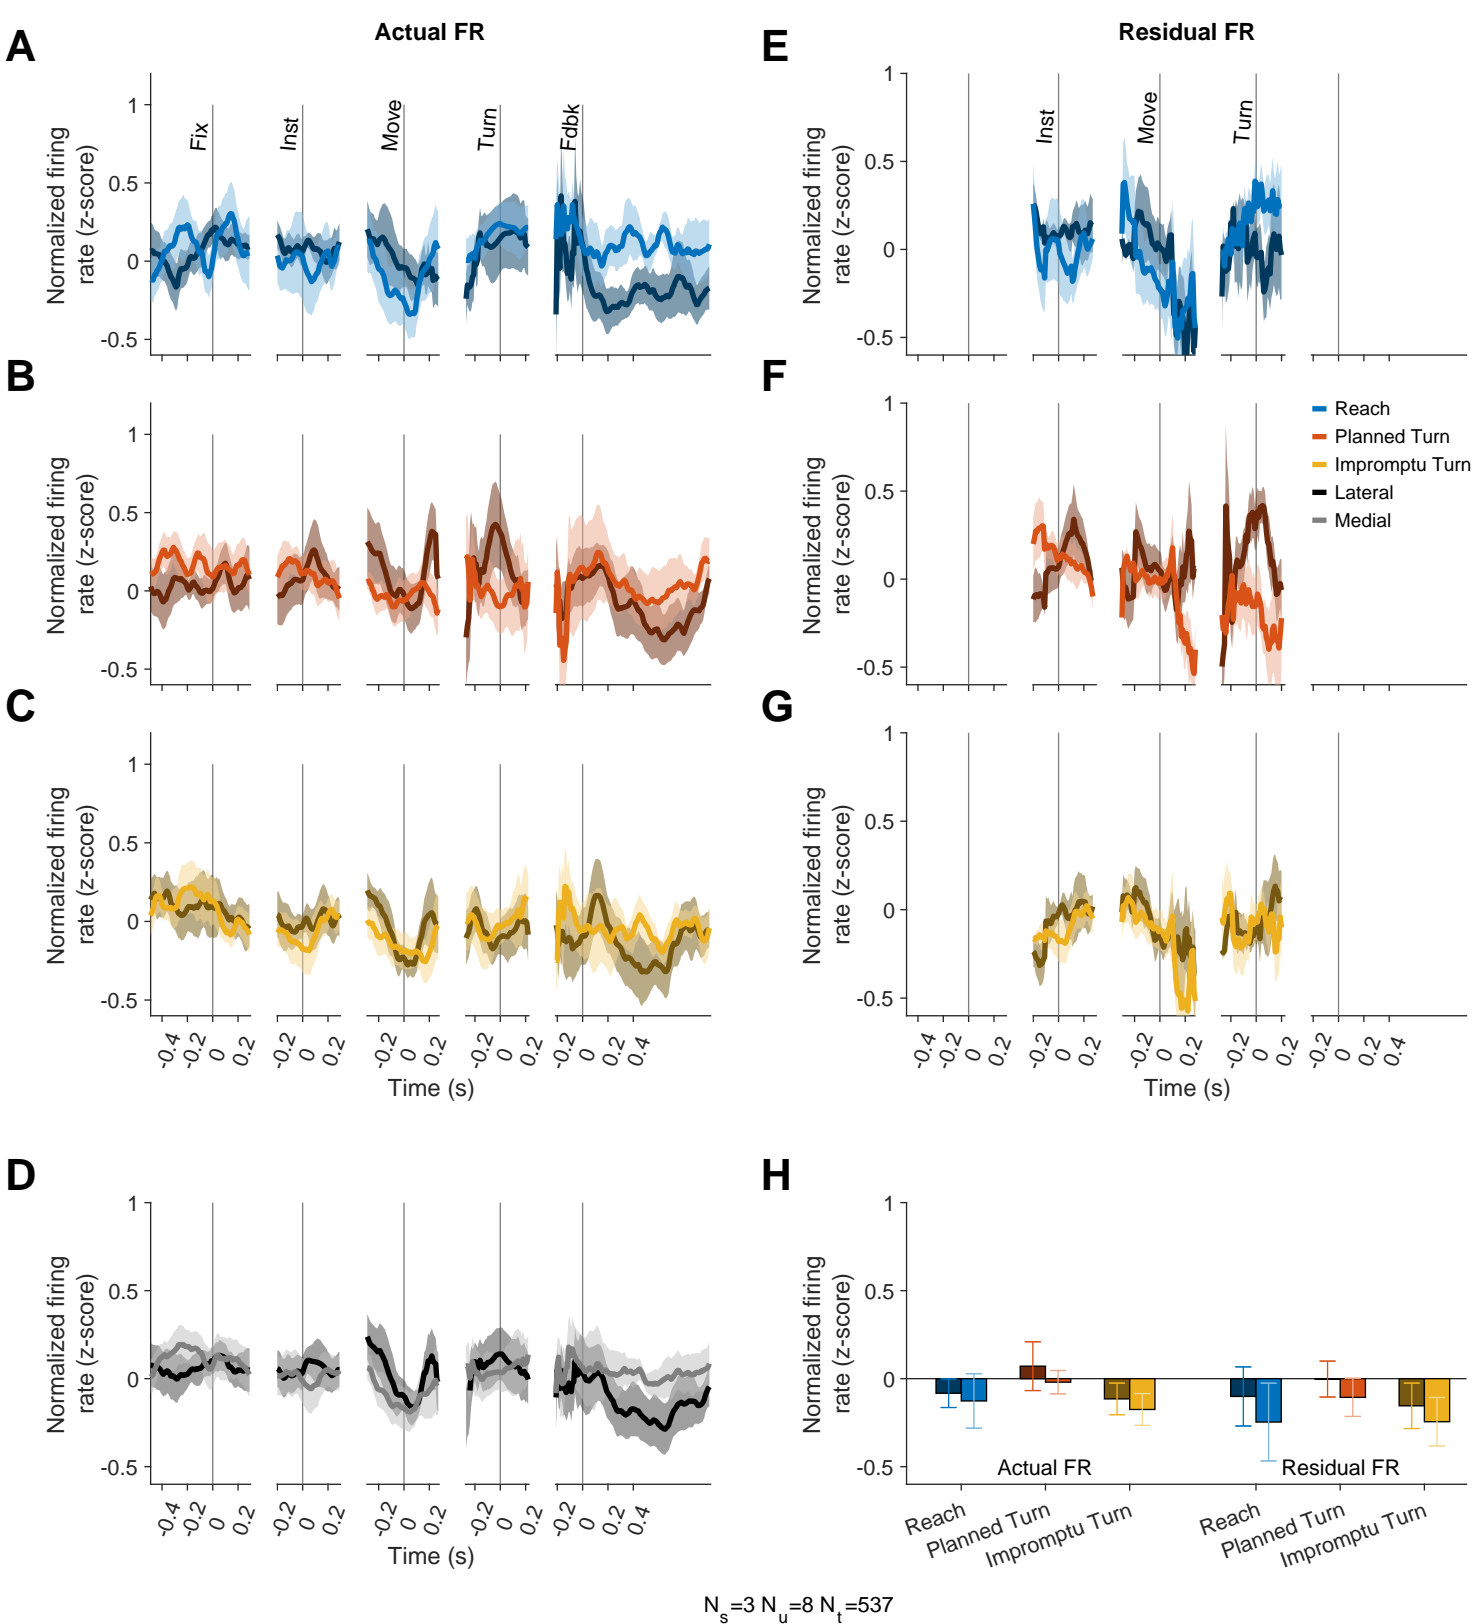

**Figure 5 – figure supplement 2: Turn units do not encode movement direction.** There were no significant differences between firing rates on medial and lateral trials on Turn Units (no significant clusters identified by cluster mass test). Figure panels are data from Turn Units arranged analogously to Fig. 5. Mean firing rates in (H) are across the same time interval as in Fig. 5H.
