# Supplementary material for: Distinct population code for movement kinematics and changes of ongoing movements in human subthalamic nucleus
Source: eLife journal article supplement (doi:10.7554/elife.64893), 2021-09-14
Supplement: supp [file elife-64893-supp-v1.zip]

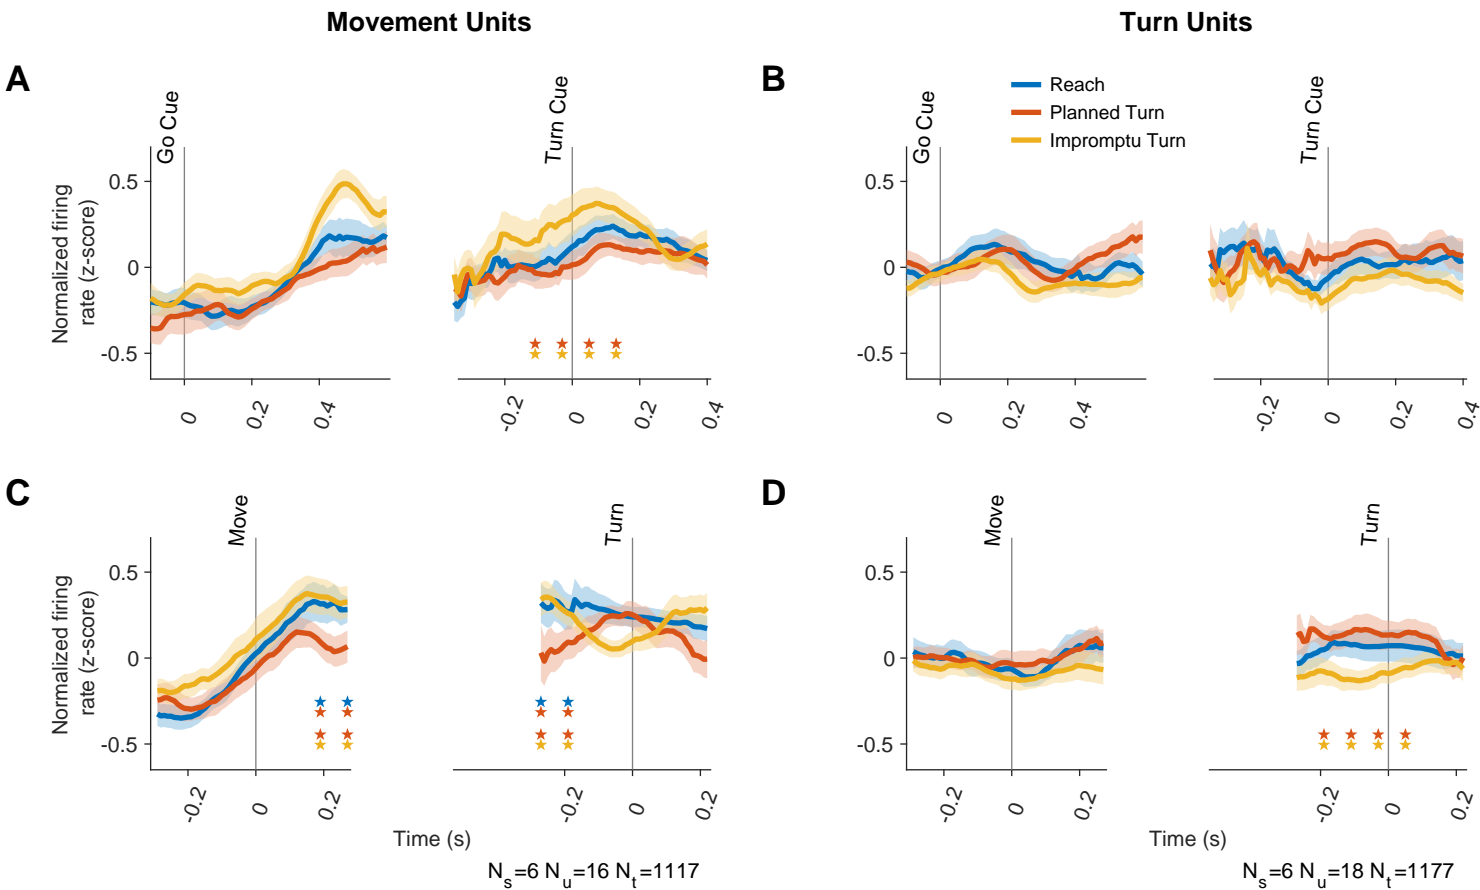

**Figure 3 – figure supplement 1: Firing rate responses aligned to cues and movements.** Mean firing rates aligned to the go and turn cues (A,B) and to the movement and turn onsets (C,D) for Movement Units and Turn Units. Horizontal pairs of colored stars indicate times with significantly different firing rates for the corresponding pairs of trial types ( $p < 0.05$ , Holm-Bonferroni corrected linear mixed effect models).
