# Supplementary material for: Distinct population code for movement kinematics and changes of ongoing movements in human subthalamic nucleus
Source: eLife journal article supplement (doi:10.7554/elife.64893), 2021-09-14
Supplement: supp [file elife-64893-supp-v1.zip]

**A**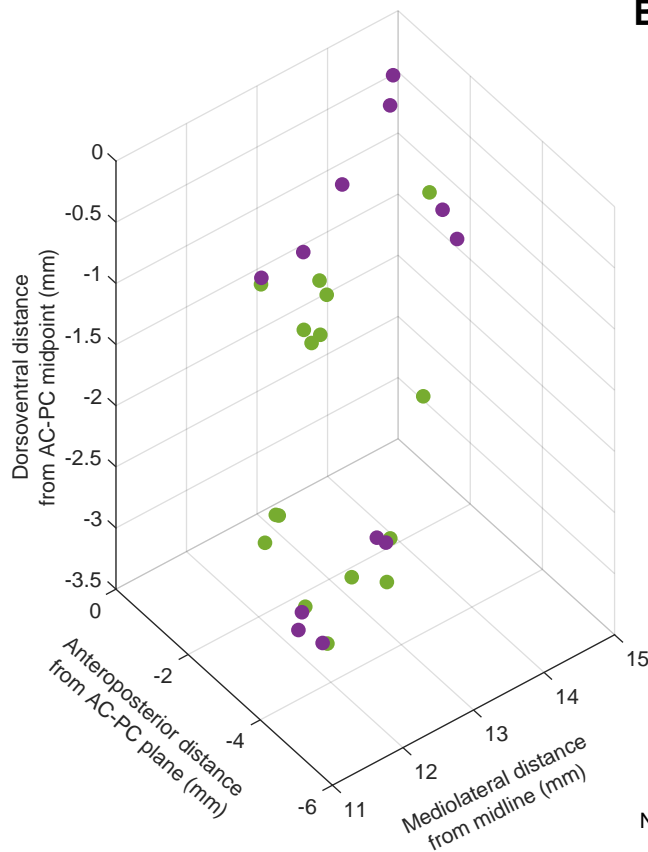**B**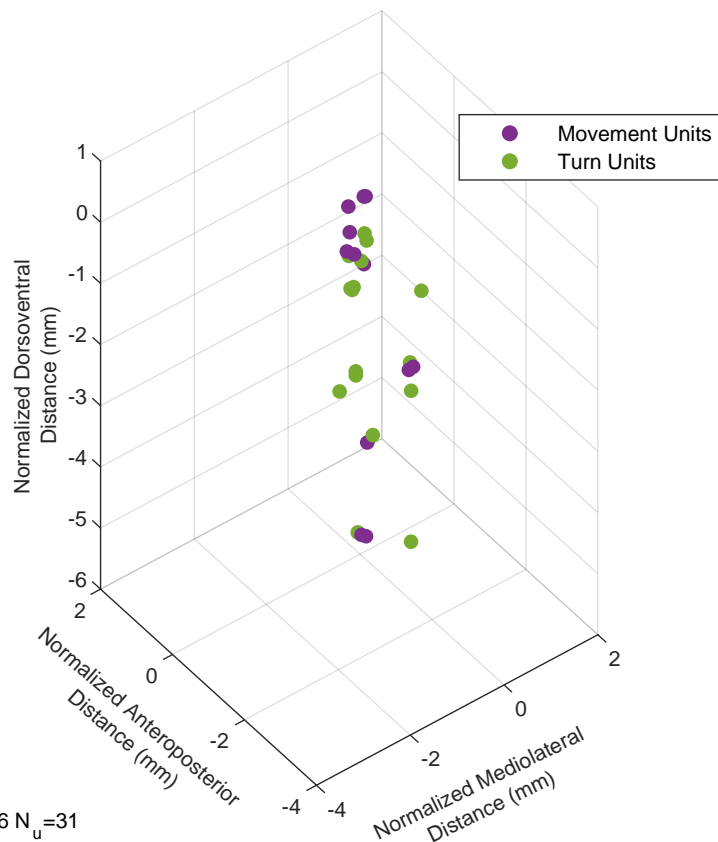

**Figure 2 – figure supplement 2: Unit locations.** The locations of all recorded units in AC-PC coordinates (A) and coordinates normalized to the electrophysiologic entry point of STN (Sharott et al., 2014) (B). Positive numbers are lateral, anterior, and superior on the x-, y-, and z-axes, respectively.  $N_s$  and  $N_u$  indicate the number of subjects and number of units represented. Coordinates were not available for eight units. Units recorded from the same location are offset a small distance for display purposes.
