# Supplementary material for: Distinct population code for movement kinematics and changes of ongoing movements in human subthalamic nucleus
Source: eLife journal article supplement (doi:10.7554/elife.64893), 2021-09-14
Supplement: supp [file elife-64893-supp-v1.zip]

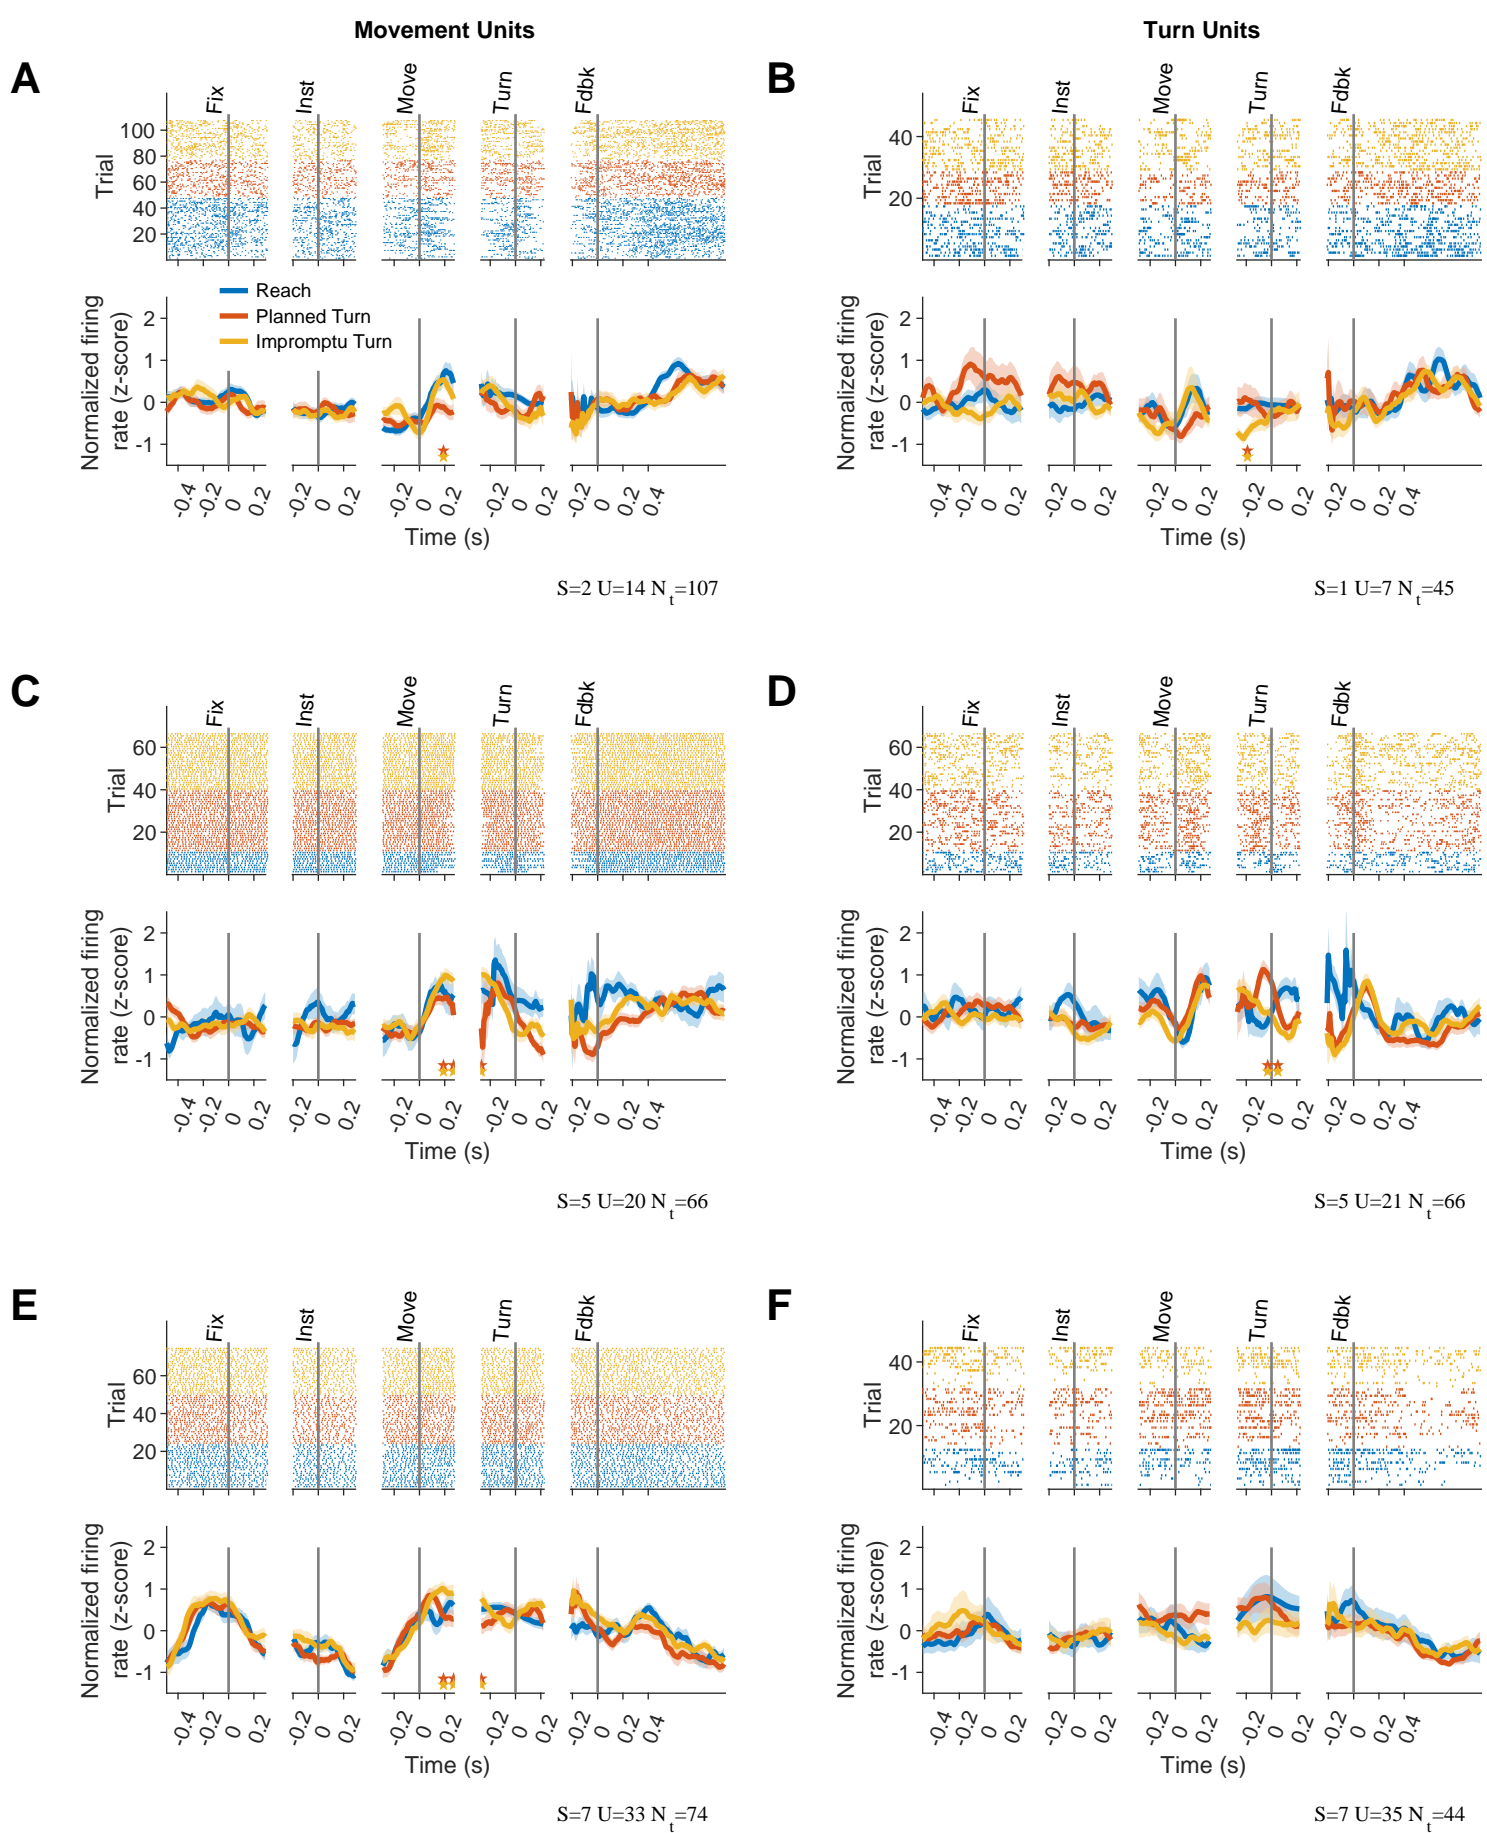

**Figure 2 - figure supplement 1: Sample units.** Raster plots and corresponding PSTHs of three example Movement Units (A,C,E) and three example Turn Units (B,D,F). Conventions are the same as in Figure 2A-D. Horizontal pairs of colored stars indicate times with significantly different firing rates for the corresponding pairs of trial types ( $p<0.1$ , cluster mass test).  $S$  and  $U$  indicate subject identity for each unit.  $N_t$  indicates the total number of trials for each unit.
