# Supplementary material for: Distinct population code for movement kinematics and changes of ongoing movements in human subthalamic nucleus
Source: eLife journal article supplement (doi:10.7554/elife.64893), 2021-09-14
Supplement: supp [file elife-64893-supp-v1.zip]

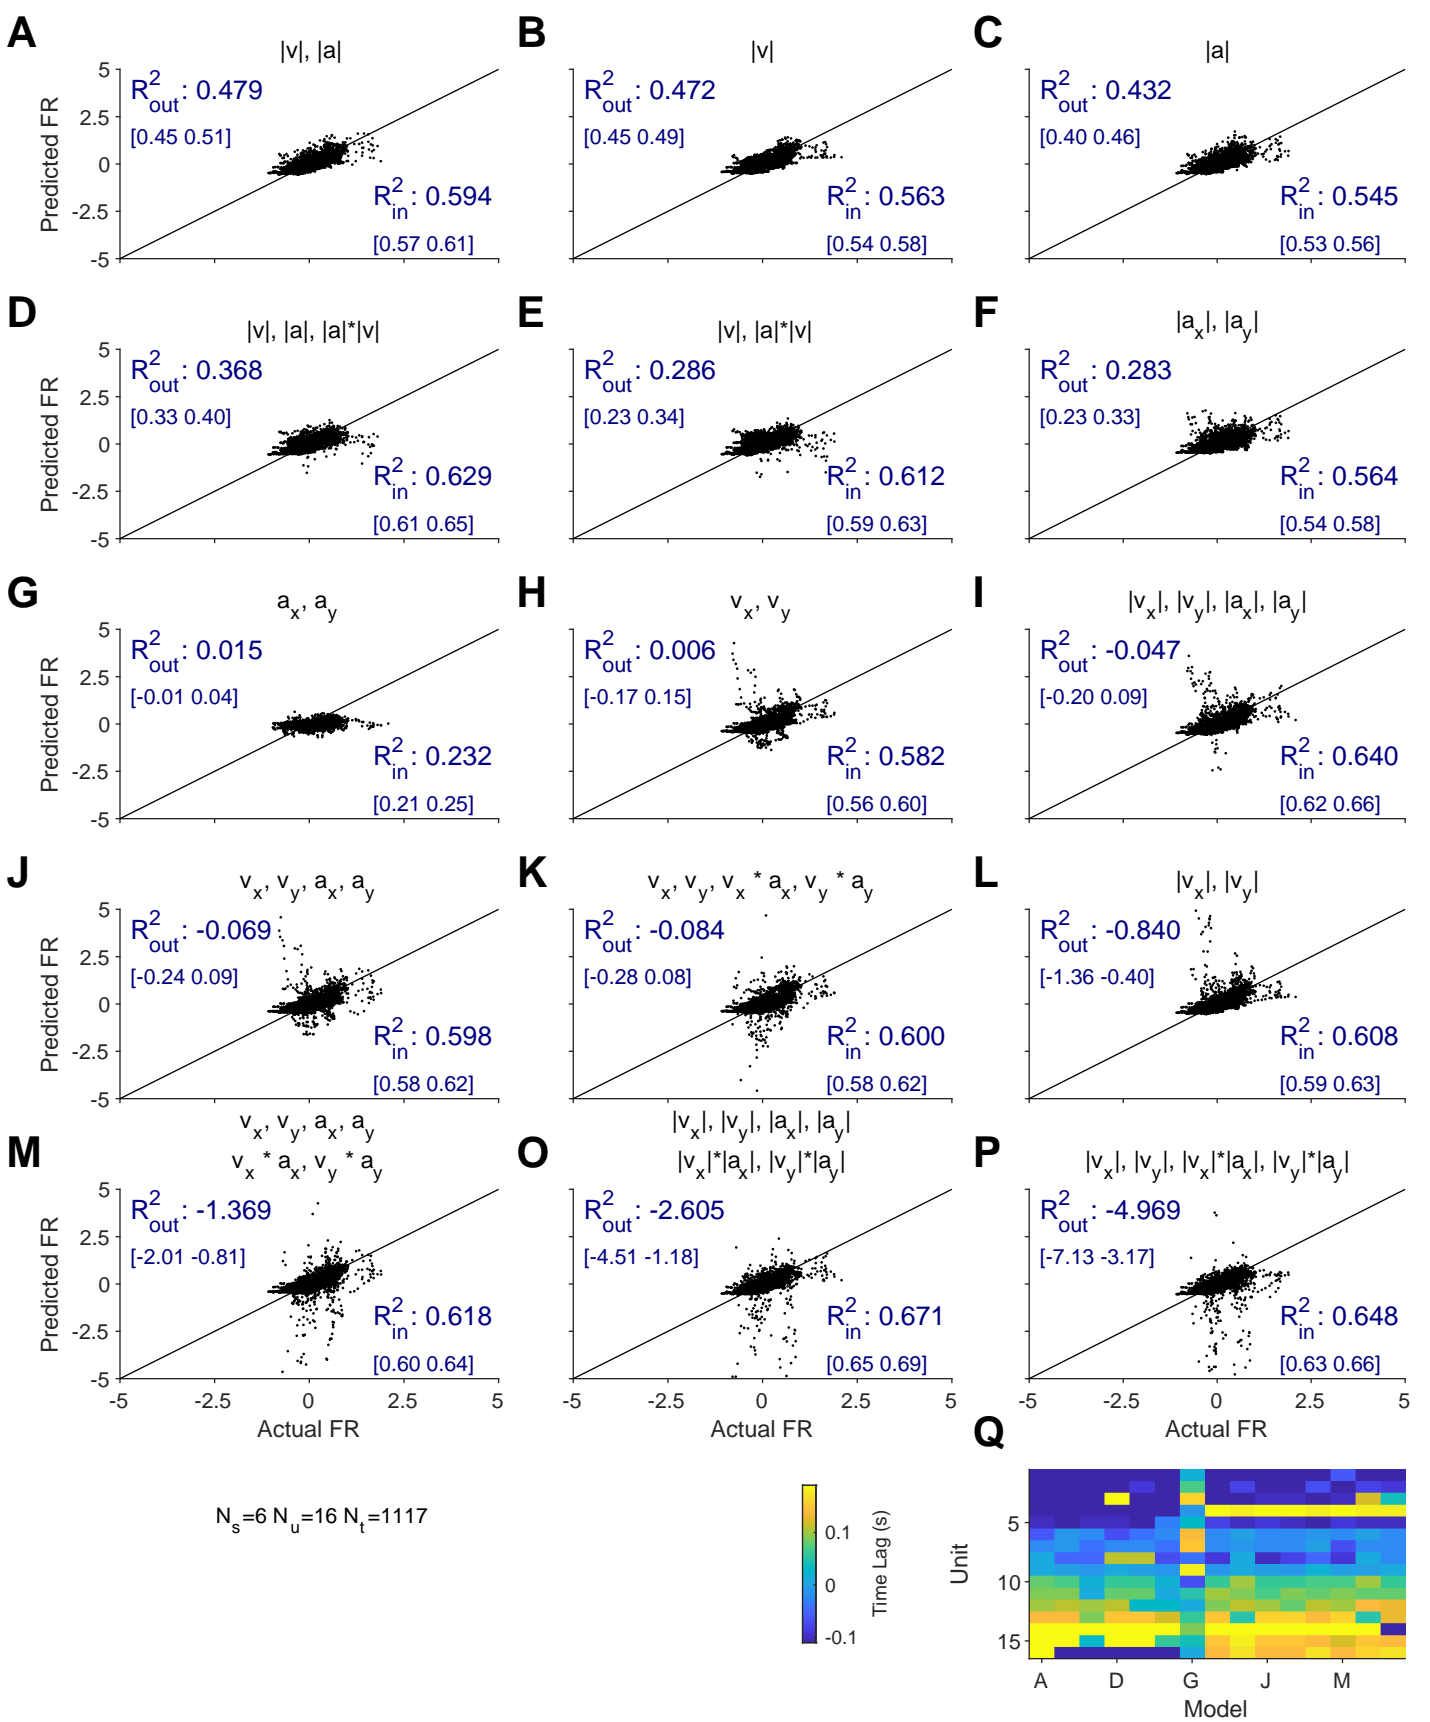

**Figure 4 – figure supplement 3: Alternative models and model selection for Movement Units.** Total speed and acceleration provide a better explanation of the Movement Unit responses compared to more complex models with distinct parameters for different movement directions. (A–P) Titles of each panel indicate the parameters of each model.  $v$  and  $a$  indicate speed and acceleration, respectively.  $x$  and  $y$  subscripts indicate movement along the horizontal and vertical axes, respectively.  $|\cdot|$  indicates Euclidean norm, which equals the absolute value for one-dimensional variables (e.g.,  $v_x$ ) and the vector magnitude for two-dimensional variables (e.g., total speed). The models were trained on time points shared across all lags (grey lines in Fig. 4 – figure supplement 2) and tested on held-out times not included in training (dark lines in Fig. 4 – figure supplement 2). Training and testing  $R^2$  are displayed for each model ( $R^2_{in}$  for in-sample, training data;  $R^2_{out}$  for out-of-sample, test data). 95% confidence intervals are shown in brackets. Negative  $R^2$  indicate residual variance that exceeds the variance of underlying data, indicating extremely poor model performance for test trials, likely due to overfitting the training data. (Q) The best-fitting time lags for each unit were similar across models. Columns correspond to models in panels A–P. Each row corresponds to a specific Movement Unit with units ordered by time lag of our chosen model (the best-fitting model containing total speed and acceleration, shown in panel A).
