# Supplementary material for: Distinct population code for movement kinematics and changes of ongoing movements in human subthalamic nucleus
Source: eLife journal article supplement (doi:10.7554/elife.64893), 2021-09-14
Supplement: supp [file elife-64893-supp-v1.zip]

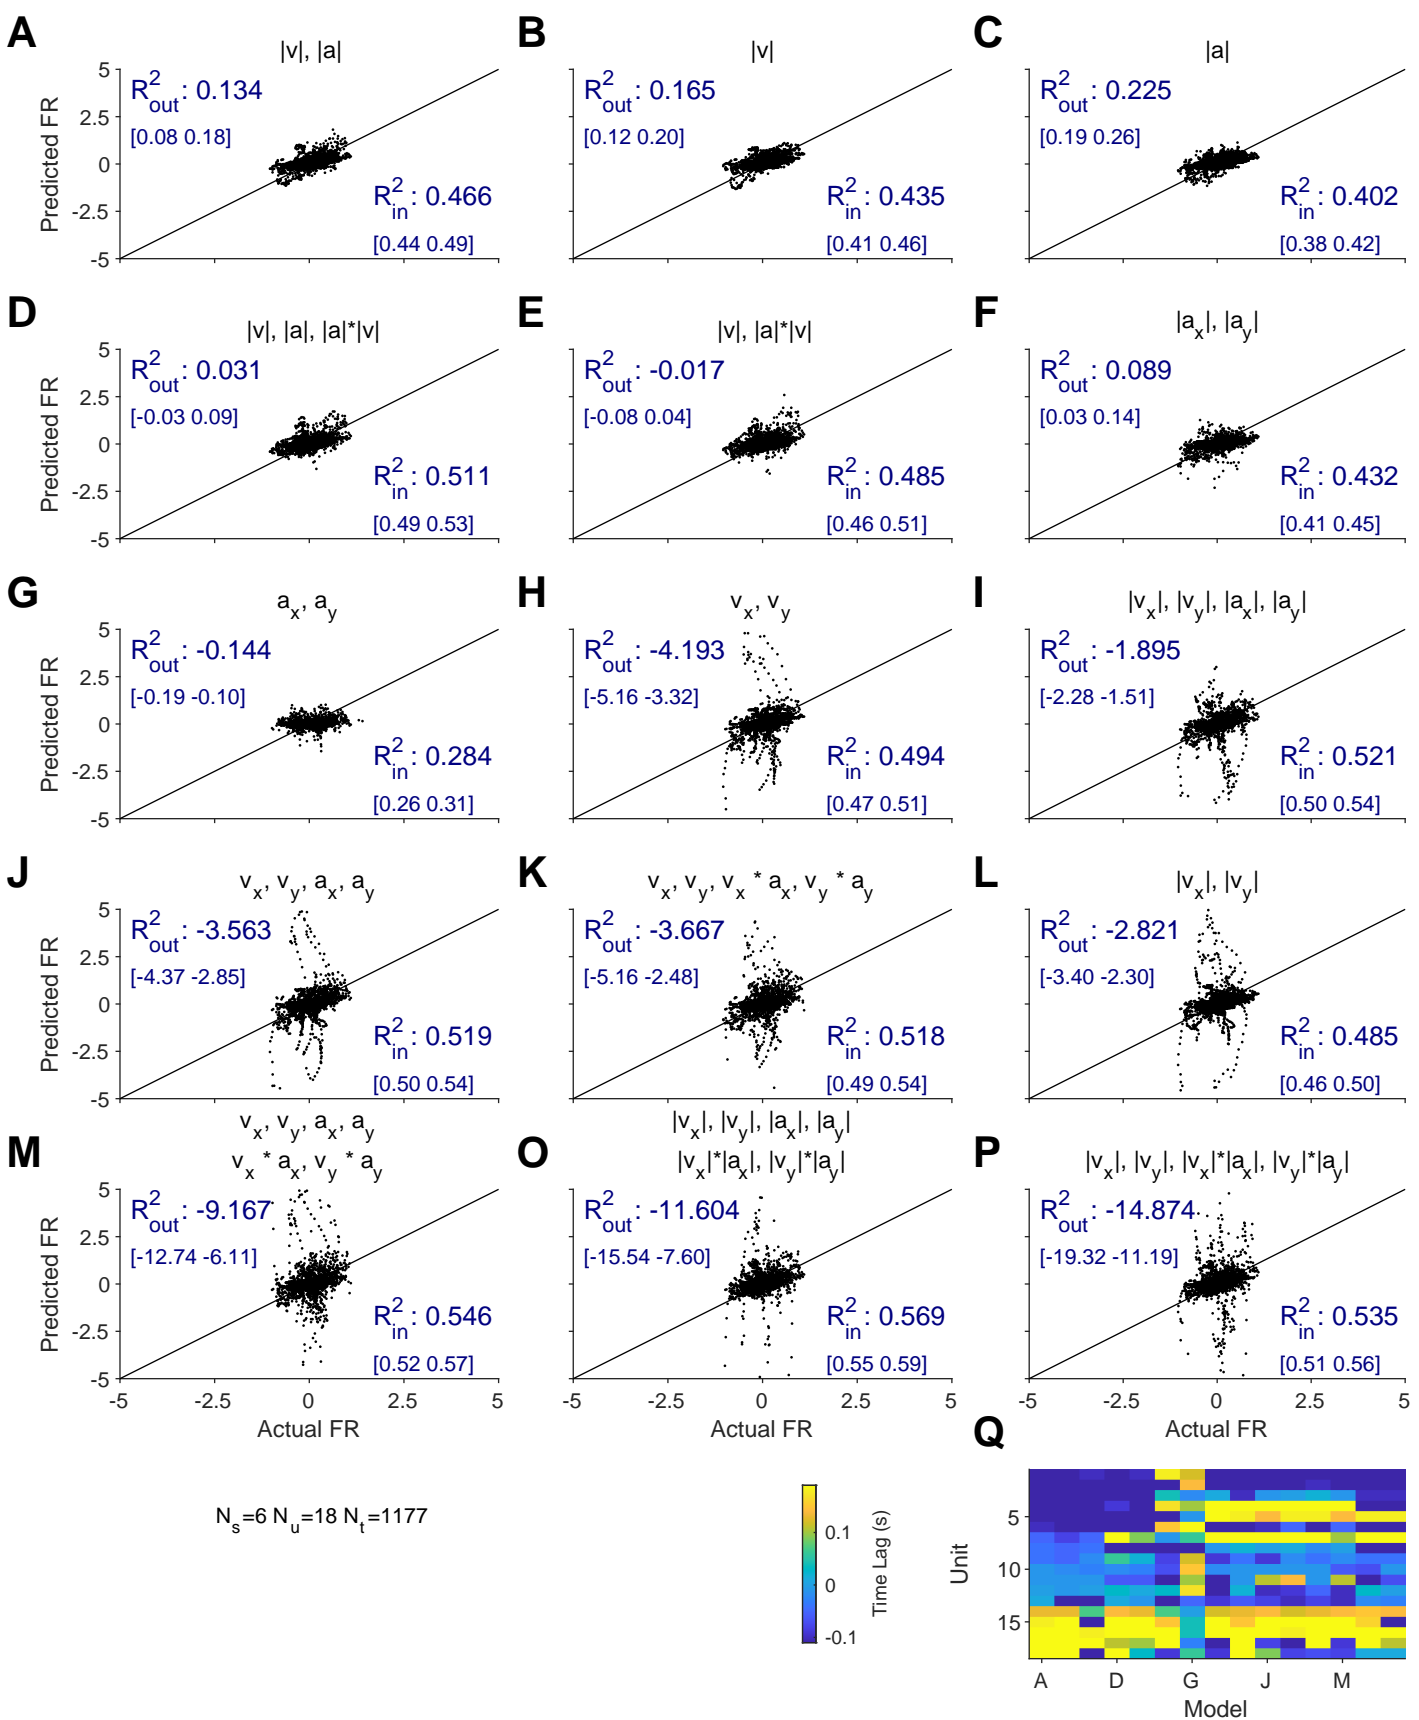

**Figure 4 – figure supplement 4: Alternative models and model selection for Turn Units.** Turn Unit firing rates have some correlation with total speed and acceleration. Figure format as in Figure 4 – supplement 3.
